# Supplementary material
Source: publisher figshare collection journal article supplement (https://acs.figshare.com/ndownloader/files/3971029)
Supplement: Supplementary file 1 [file 3971029]

## *Supporting Information*

### *Manuscript Title:*

**Reaction of Titanacyclobutene-Silacyclobutene Fused-Ring Complexes  
with Nitriles *via* Formal Insertion of the C-N Triple Bond of Nitrile into  
the Silacyclobutene Ring**

### *Authors:*

Jing Zhao,<sup>†</sup> Shaoguang Zhang,<sup>‡</sup> Wen-Xiong Zhang,<sup>\*,‡</sup> and Zhenfeng Xi<sup>\*,‡,§</sup>

### *Affiliations:*

<sup>†</sup> Beijing National Laboratory of Molecular Sciences (BNLMS), Institute of Chemistry, Chinese Academy of Sciences (CAS), Beijing 100190, China;

<sup>‡</sup> Key Laboratory of Bioorganic Chemistry and Molecular Engineering of Ministry of Education, College of Chemistry, Peking University, Beijing 100871, China;

<sup>§</sup> State Key Laboratory of Organometallic Chemistry, Shanghai Institute of Organic Chemistry, Chinese Academy of Sciences, Shanghai 200032, China

E-mail: wx\_zhang@pku.edu.cn; zfxi@pku.edu.cn

### *Contents:*

|                                                                                 |                |
|---------------------------------------------------------------------------------|----------------|
| 1) Experimental details and characterization data for <b>5b</b> and <b>6a-e</b> | <b>S2–S4</b>   |
| 2) <sup>1</sup> H NMR and <sup>13</sup> C NMR Spectra of All New Compounds      | <b>S5–S10</b>  |
| 3) X-ray Crystallographic Studies for <b>6a</b> , <b>6d</b> , <b>6e</b>         | <b>S11–S14</b> |

## 1) Experimental details and characterization data for **5b** and **6a-e**.

**General Procedures.** All reactions were carried out under a slightly positive pressure of dry and oxygen-free nitrogen by using standard Schlenk line techniques or under a nitrogen atmosphere in a glovebox. The nitrogen in the glovebox was constantly circulated through a copper/molecular sieves catalyst unit. The oxygen and moisture concentrations in the glovebox atmosphere were monitored to ensure both were always below 1 ppm. Unless otherwise noted, all starting materials were commercially available and were used without further purification. Solvent was distilled from sodium/benzophenone under a nitrogen atmosphere.  $^1\text{H}$  NMR and  $^{13}\text{C}$  NMR spectra were recorded on a Bruker-400 spectrometer (FT, 400 MHz for  $^1\text{H}$ ; 100 MHz for  $^{13}\text{C}$ ) and a Bruker-500 spectrometer (FT, 500 MHz for  $^1\text{H}$ ; 125 MHz for  $^{13}\text{C}$ ) at room temperature. Organometallic samples for NMR spectroscopic measurements were prepared in the glovebox by use of J. Young valve NMR tubes (Wilmad 528-JY).

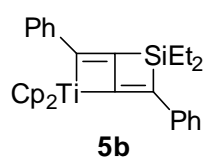

**Isolation of Complex **5b**.** In a 20 mL Schlenk tube,  $\text{Et}_2\text{Si}(\text{C}\equiv\text{CPh})_2$  (288 mg, 1.0 mmol) was added to the solution of  $[\text{Ti}(\eta^5\text{-C}_5\text{H}_5)_2(\eta^2\text{-btmse})]$  (348 mg, 1.0 mmol) in benzene and the resulting mixture was heated to 80 °C for 3 h.<sup>1</sup> All volatiles were distilled off at 80 °C in vacuum to give red solids **5b** (354 mg, 76% based on 1 mmol scale).  $^1\text{H}$  NMR (500 MHz,  $\text{C}_6\text{D}_6$ ):  $\delta$  = 0.89-0.92 (m, 10H,  $\text{SiEt}_2$ ), 5.32 (s, 10H,  $\text{C}_5\text{H}_5$ ), 7.18-7.23 (m, 2H,  $\text{C}_6\text{H}_5$ ), 7.37-7.45 (m, 4H,  $\text{C}_6\text{H}_5$ ), 7.65 (d,  $J$  = 7.5 Hz, 2H,  $\text{C}_6\text{H}_5$ ), 7.89 (d,  $J$  = 7.0 Hz, 2H,  $\text{C}_6\text{H}_5$ );  $^{13}\text{C}$  NMR (125 MHz,  $\text{C}_6\text{D}_6$ ):  $\delta$  = 7.75 (s, 2  $\text{CH}_2$ ), 7.97 (s, 2  $\text{CH}_3$ ), 76.16 (s, 1 quat. C), 105.95 (s, 10 CH), 127.09 (s, 1 CH), 127.23 (s, 2 CH), 127.80 (s, 1 CH), 128.85 (s, 2 C), 129.10 (s, 2 CH), 129.73 (s, 2 CH), 141.14 (s, 1 quat. C), 141.31 (s, 1 quat. C), 152.19 (s, 1 quat. C), 212.10 (s, 1 quat. C), 261.62 (s, 1 quat. C).

**Formation of complexes **6a-c** from complex **5a** and aryl nitriles. A general procedure for preparation of **6a**:** In a 20 mL Schlenk tube, PhCN (75  $\mu\text{L}$ , 0.75 mmol) was added to the benzene solution (5 mL) of compound **5a** (219 mg, 0.5 mmol). After the reaction mixture was stirred at 80 °C for 5 h, it was dried up under vacuum and the residue was washed with hexane. After filtering, the solid was dried up under vacuum to precipitate **6a** as dark green solids.

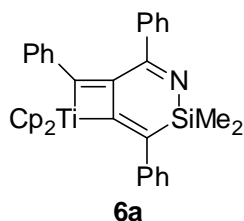

Dark green solid, 181 mg, 67% based on 0.5 mmol scale.  $^1\text{H}$  NMR (400 MHz,  $\text{C}_6\text{D}_6$ ):  $\delta$  = 0.66 (s, 6H,  $\text{SiMe}_2$ ), 5.73 (s, 10H,  $\text{C}_5\text{H}_5$ ), 6.61 (d,  $J$  = 7.2 Hz, 2H,  $\text{C}_6\text{H}_5$ ), 6.71 (t,  $J$  = 7.5 Hz, 1H,  $\text{C}_6\text{H}_5$ ), 6.84-7.25 (m, 10H,  $\text{C}_6\text{H}_5$ ), 7.70 (d,  $J$  = 6.8 Hz, 2H,  $\text{C}_6\text{H}_5$ );  $^{13}\text{C}$  NMR (100 MHz,  $\text{C}_6\text{D}_6$ ):  $\delta$  = 0.57 (s, 2  $\text{CH}_3$ ), 95.69 (s, 1 quat. C), 113.26 (s, 10 CH), 125.53 (s, 1 CH), 125.76 (s, 1 CH), 126.78 (s, 2 CH), 127.18 (s, 2 CH), 127.48 (s, 2 CH), 127.83 (s, 2 CH), 128.24 (s, 2 CH), 128.47 (s, 1 CH), 129.09 (s, 2 CH), 141.60 (s, 1 quat. C), 144.60 (s, 1 quat. C), 145.56 (s, 1 quat. C), 147.75 (s, 1 quat. C), 174.12 (s, 1 quat. C), 214.26 (s, 1 quat. C), 214.85 (s, 1 quat. C). Single crystals of **6a** suitable for X-ray analysis were grown in THF at room temperature. Elemental Analysis Calcd (%) for  $\text{C}_{35}\text{H}_{31}\text{NSiTi}$ : C, 77.62; H, 5.77; N, 2.59; Found: C, 77.24; H, 5.91; N, 2.28.

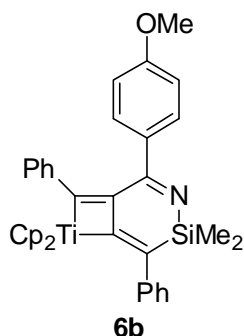

Dark green solid, 180 mg, 63% based on 0.5 mmol scale.  $^1\text{H}$  NMR (400 MHz,  $\text{C}_6\text{D}_6$ ):  $\delta$  = 0.67 (s, 6H,  $\text{SiMe}_2$ ), 3.15 (s, 3H,  $\text{OCH}_3$ ), 5.75 (s, 10H,  $\text{C}_5\text{H}_5$ ), 6.58 (d,  $J$  = 7.6 Hz, 2H, Ar), 6.67-7.26 (m, 10H, Ar), 7.76 (d,  $J$  = 7.6 Hz, 2H, Ar);  $^{13}\text{C}$  NMR (100 MHz,  $\text{C}_6\text{D}_6$ ):  $\delta$  = 0.65 (s, 2  $\text{CH}_3$ ), 54.59 (s, 1  $\text{CH}_3$ ), 95.83 (s, 1 quat. C), 112.67 (s, 2 CH), 113.23 (s, 10 CH), 125.51 (s, 1 CH), 125.83 (s, 1 CH), 127.09 (s, 2 CH), 127.48 (s, 2 C), 127.89 (s, 2 CH), 128.23 (s, 2 CH), 130.77 (s, 2 CH), 137.05 (s, 1 quat. C), 141.77 (s, 1 quat. C), 145.50 (s, 1 quat. C), 147.84 (s, 1 quat. C), 160.48 (s, 1 quat. C), 173.49 (s, 1 quat. C), 213.83 (s, 1 quat. C), 214.87 (s, 1 quat. C).

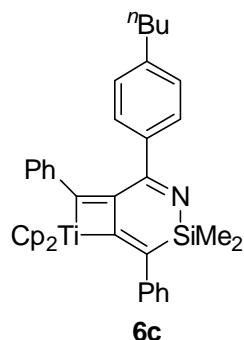

Dark green solid, 212 mg, 71% based on 0.5 mmol scale.  $^1\text{H}$  NMR (500 MHz,  $\text{C}_6\text{D}_6$ ):  $\delta$  = 0.66 (s, 6H,  $\text{SiMe}_2$ ), 0.85 (t,  $J$  = 7.5 Hz, 3H,  $\text{CH}_3\text{CH}_2\text{CH}_2\text{CH}_2$ ), 1.09-1.61 (m, 2H,  $\text{CH}_3\text{CH}_2\text{CH}_2\text{CH}_2$ ), 1.35-1.41 (m, 2H,  $\text{CH}_3\text{CH}_2\text{CH}_2\text{CH}_2$ ), 2.32 (t,  $J$  = 7.5 Hz, 2H,  $\text{CH}_3\text{CH}_2\text{CH}_2\text{CH}_2$ ), 5.75 (s, 10H,  $\text{C}_5\text{H}_5$ ), 6.64 (d,  $J$  = 7.5 Hz, 2H, Ar), 6.73 (t,  $J$  = 7.5 Hz, 1H,  $\text{C}_6\text{H}_5$ ), 6.81 (d,  $J$  = 8.0 Hz, 2H, Ar), 6.85-7.25 (m, 7H, Ar), 7.66 (d,  $J$  = 8.0 Hz, 2H, Ar);  $^{13}\text{C}$  NMR (125 MHz,  $\text{C}_6\text{D}_6$ ):  $\delta$  = 0.60 (s, 2  $\text{CH}_3$ ), 14.12 (s, 1  $\text{CH}_3$ ), 22.21 (s, 1  $\text{CH}_2$ ), 33.62 (s, 1  $\text{CH}_2$ ), 35.53 (s, 1  $\text{CH}_2$ ), 95.53 (s, 1 quat. C), 113.22 (s, 10 CH), 125.51 (s, 1 CH), 125.59 (s, 1 CH), 126.90 (s, 2 CH), 127.36 (s, 2 C), 127.50 (s, 2 CH), 127.77 (s, 2 CH), 128.22 (s, 2 CH), 129.19 (s, 2 CH), 141.74 (s, 1 quat. C), 142.21 (s, 1 quat. C), 142.97 (s, 1 quat. C), 145.65 (s, 1 quat. C), 147.82 (s, 1 quat. C), 174.16 (s, 1 quat. C), 214.69 (s, 1 quat. C), 214.71 (s, 1 quat. C).

**Formation of complexes 6d,e from complexes 5b,c and PhCN. A general procedure for preparation of 6d:** In a 20 mL Schlenk tube, PhCN (75  $\mu\text{L}$ , 0.75 mmol) was added to the benzene solution (5 mL) of compound **5b** (233 mg, 0.5 mmol). After the reaction mixture was stirred at 80  $^\circ\text{C}$  for 21 h, it was dried up under vacuum and the residue was washed with hexane. After filtering, the solid was dried up under vacuum to precipitate **6d** as dark green solids.

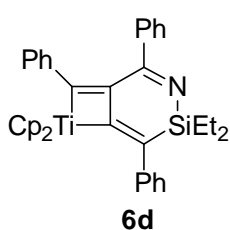

Dark green solid, 188 mg, 66% based on 0.5 mmol scale.  $^1\text{H}$  NMR (400 MHz,  $\text{C}_6\text{D}_6$ ):  $\delta$  = 1.03-1.21 (m, 10H,  $\text{SiEt}_2$ ), 5.77 (s, 10H,  $\text{C}_5\text{H}_5$ ), 6.61 (d,  $J$  = 7.2 Hz, 2H,  $\text{C}_6\text{H}_5$ ), 6.71 (t,  $J$  = 7.0 Hz, 1H,  $\text{C}_6\text{H}_5$ ), 6.85-6.97 (m, 6H,  $\text{C}_6\text{H}_5$ ), 7.12-7.24 (m, 4H,  $\text{C}_6\text{H}_5$ ), 7.66 (d,  $J$  = 6.8 Hz, 2H,  $\text{C}_6\text{H}_5$ );  $^{13}\text{C}$  NMR (100 MHz,  $\text{C}_6\text{D}_6$ ):  $\delta$  = 7.92 (s, 2  $\text{CH}_3$  & 2  $\text{CH}_2$ ), 96.23 (s, 1 quat. C), 113.30 (s, 10 CH), 125.45 (s, 1 CH), 125.63 (s, 1 CH), 126.74 (s, 2 CH), 127.17 (s, 2 C), 127.38 (s, 2 CH), 127.81 (s, 2 CH), 128.22 (s, 2 CH), 128.33 (s, 1 CH), 129.10 (s, 2 CH), 139.19 (s, 1 quat. C), 144.87 (s, 1 quat. C), 145.67 (s, 1 quat. C), 148.14 (s, 1 quat. C), 174.79 (s, 1 quat. C), 214.46 (s, 1 quat. C), 215.60 (s, 1 quat. C). Single crystals of **6d** suitable for X-ray analysis were grown in THF at room temperature. Elemental Analysis Calcd (%) for  $\text{C}_{37}\text{H}_{35}\text{NSiTi}$ : C, 78.01; H, 6.19; N, 2.46; Found: C, 77.90; H, 6.21; N, 2.37.

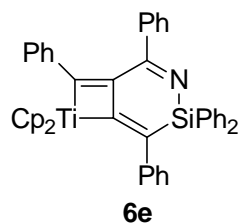

Dark green solid, 263 mg, 79% based on 0.5 mmol scale.  $^1\text{H}$  NMR (400 MHz,  $\text{C}_6\text{D}_6$ ): 5.75 (s, 10H,  $\text{C}_5\text{H}_5$ ), 6.65 (d,  $J = 7.2$  Hz, 2H,  $\text{C}_6\text{H}_5$ ), 6.72 (t,  $J = 7.2$  Hz, 1H,  $\text{C}_6\text{H}_5$ ), 6.84-7.10 (m, 13H,  $\text{C}_6\text{H}_5$ ), 7.18-7.37 (m, 3H,  $\text{C}_6\text{H}_5$ ), 7.72 (d,  $J = 7.2$  Hz, 2H,  $\text{C}_6\text{H}_5$ ), 8.05-8.13 (m, 4H,  $\text{C}_6\text{H}_5$ );  $^{13}\text{C}$  NMR data were not collected because of the poor solubility of **6e** in  $\text{C}_6\text{D}_6$ , THF- $d_8$ , toluene- $d_8$ , etc. Single crystals of **6e** suitable for X-ray analysis were grown in THF at room temperature. Elemental Analysis Calcd (%) for  $\text{C}_{45}\text{H}_{35}\text{NSiTi}$ : C, 81.19; H, 5.30; N, 2.10; Found: C, 80.82; H, 5.47; N, 1.99.

### **Reference:**

1. Horáček, M.; Bazyakina, N.; Štepnička, P.; Gyepes, R.; Císařová, I.; Bredeau, S.; Meunier, P.; Kubišta, J.; Mach, K. *J. Organomet. Chem.* **2001**, 628, 30-38.

## 2) $^1\text{H}$ NMR and $^{13}\text{C}$ NMR Spectra of All New Compounds

### $^1\text{H}$ NMR-5b

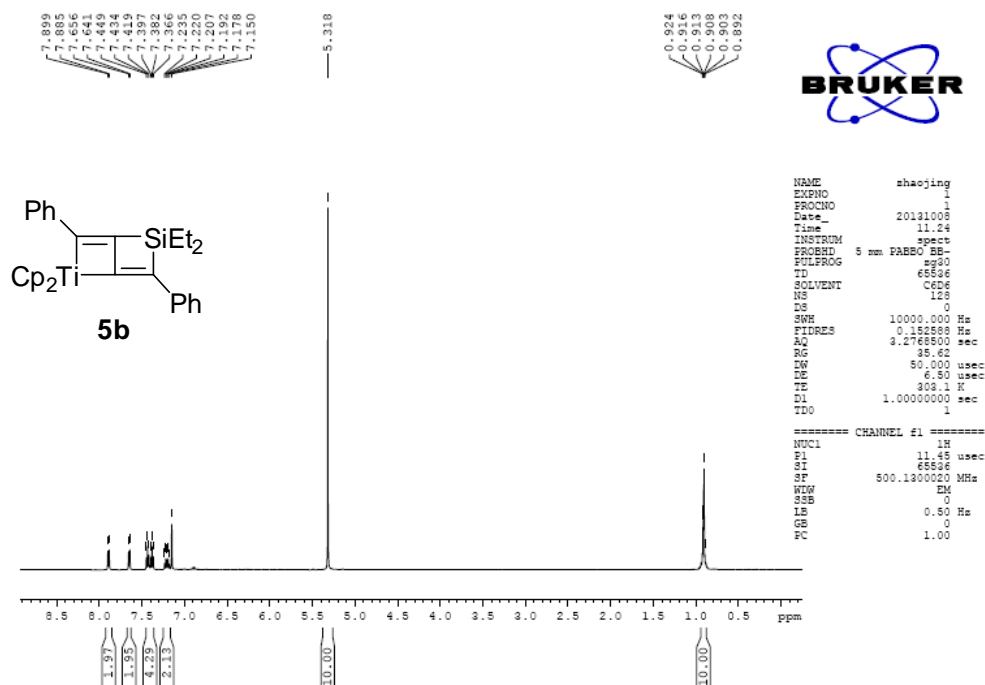

### $^{13}\text{C}$ NMR-5b

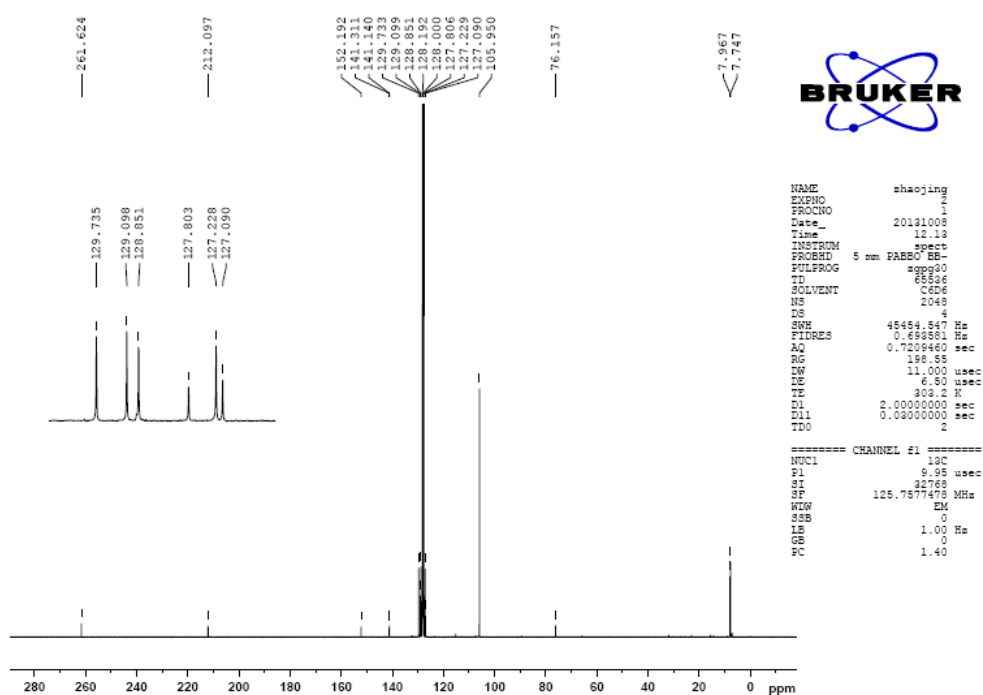

<sup>1</sup>H NMR-6a

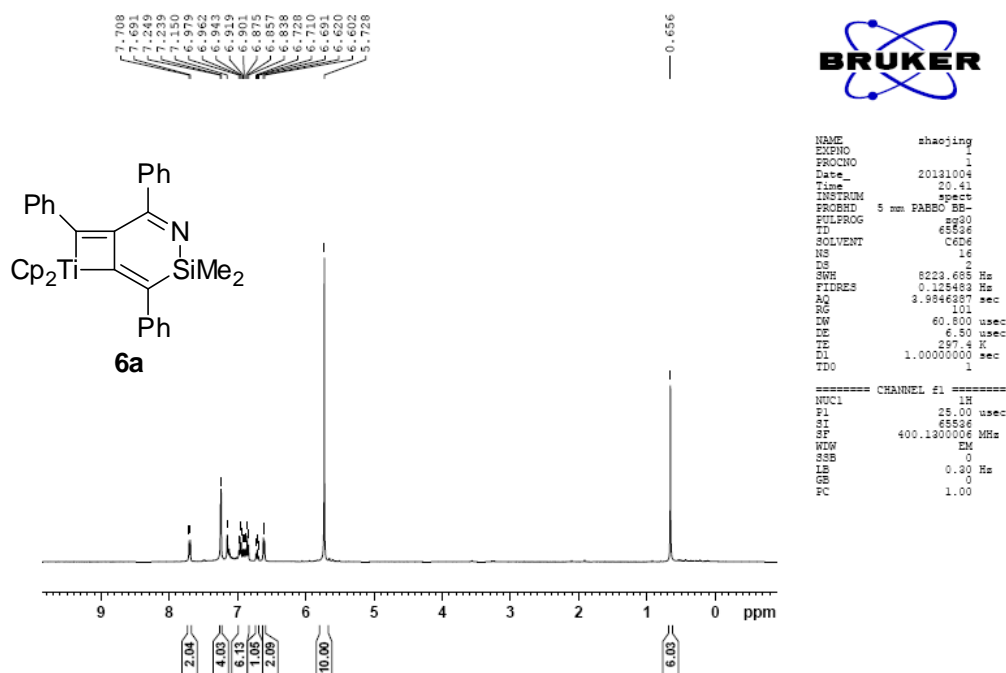

<sup>13</sup>C NMR-6a

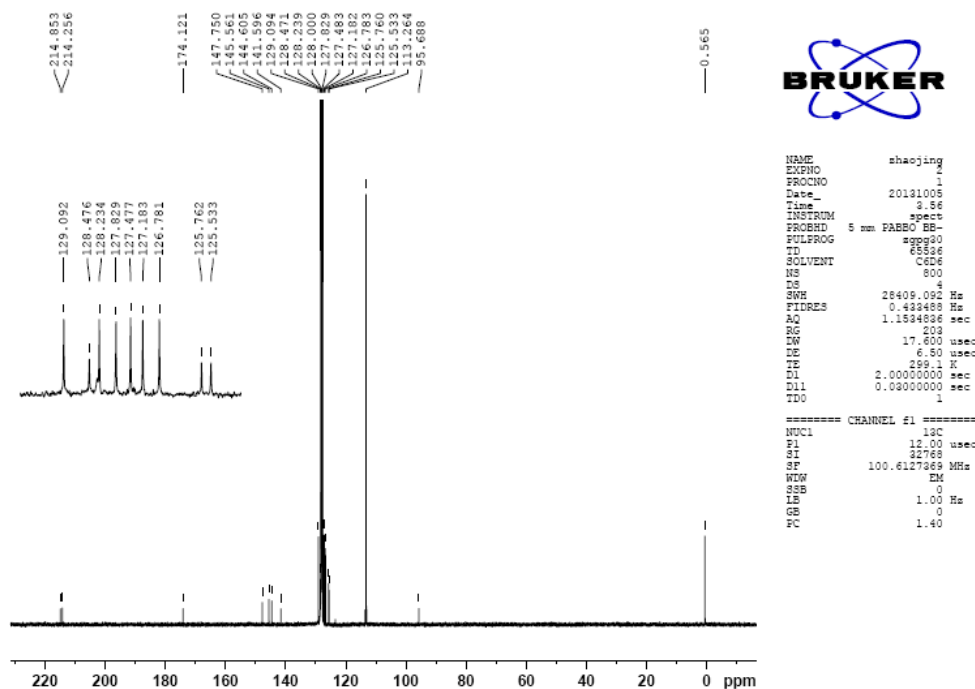

<sup>1</sup>H NMR-6b

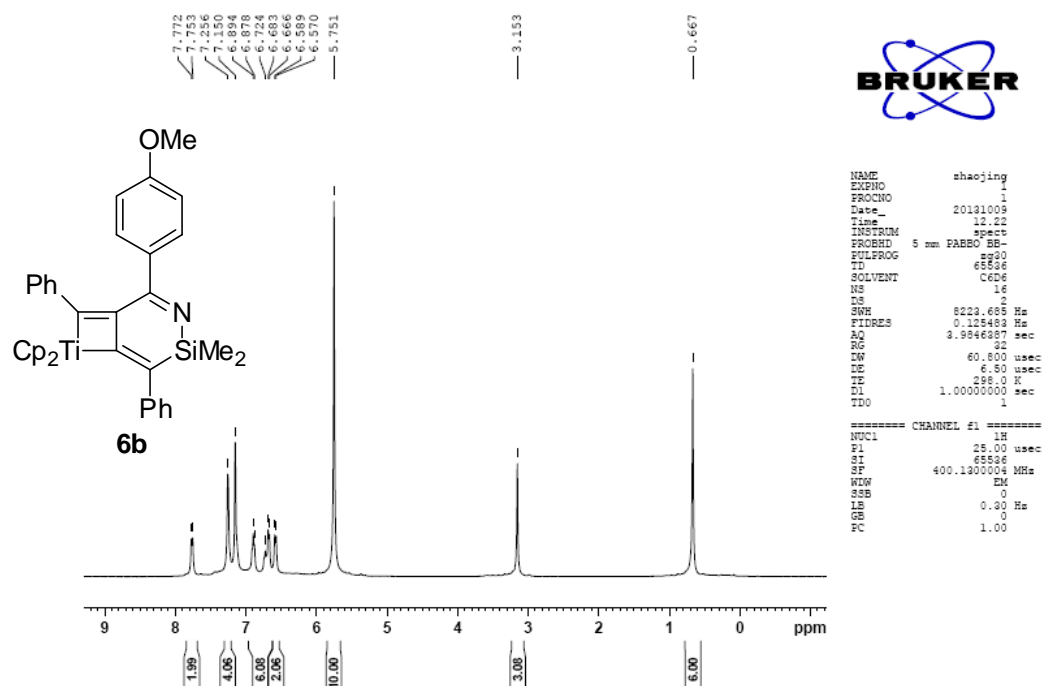

<sup>13</sup>C NMR -6b

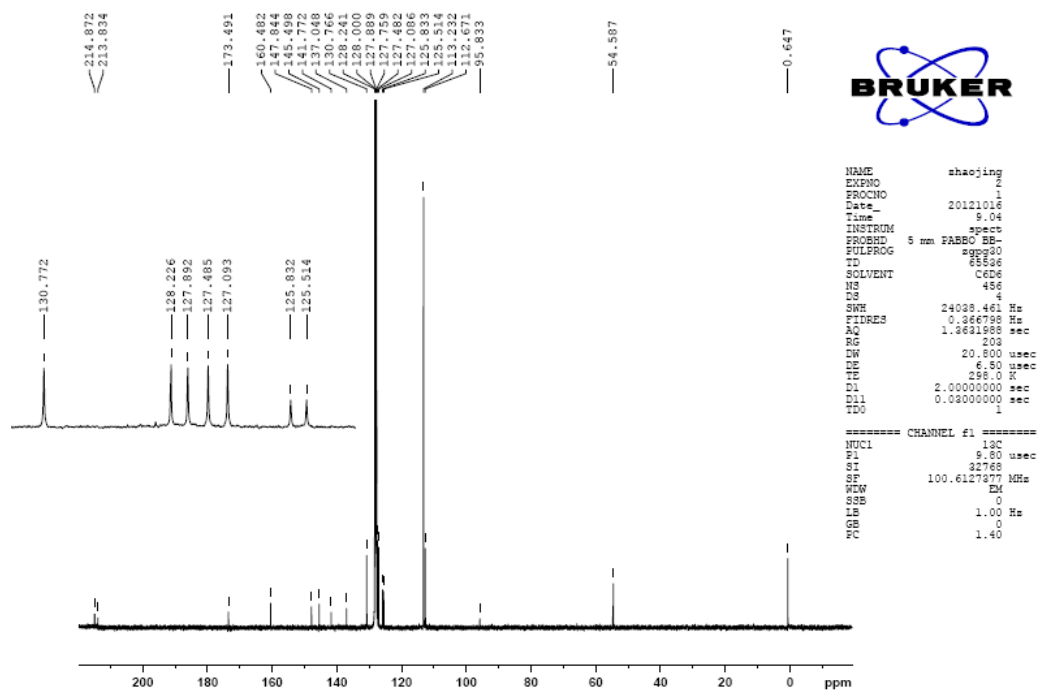

<sup>1</sup>H NMR-**6c**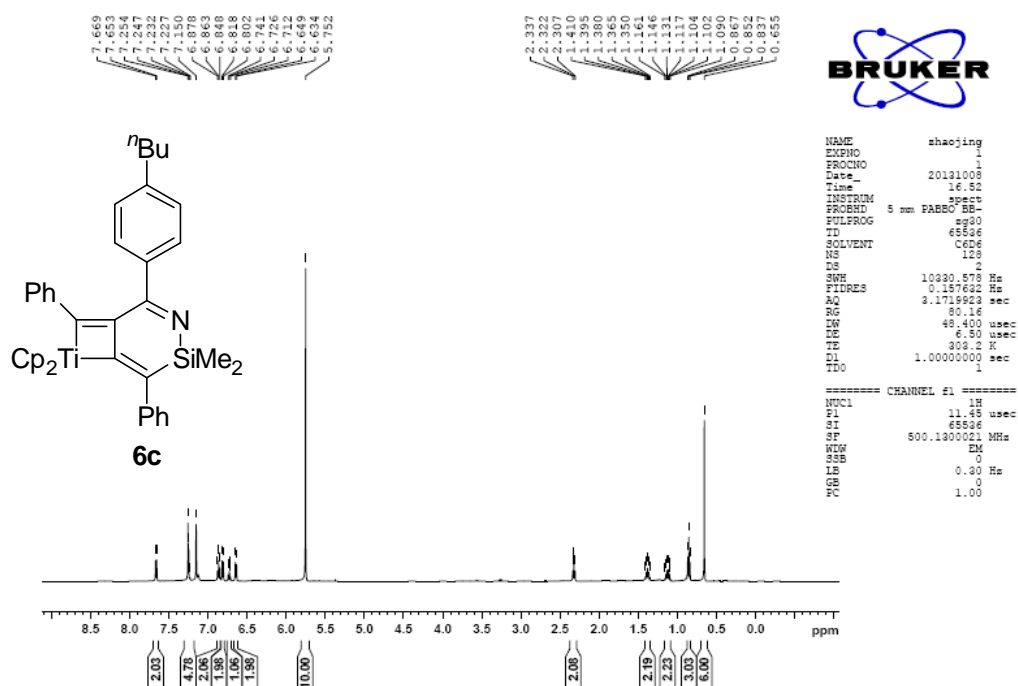 $^{13}\text{C}$  NMR-**6c**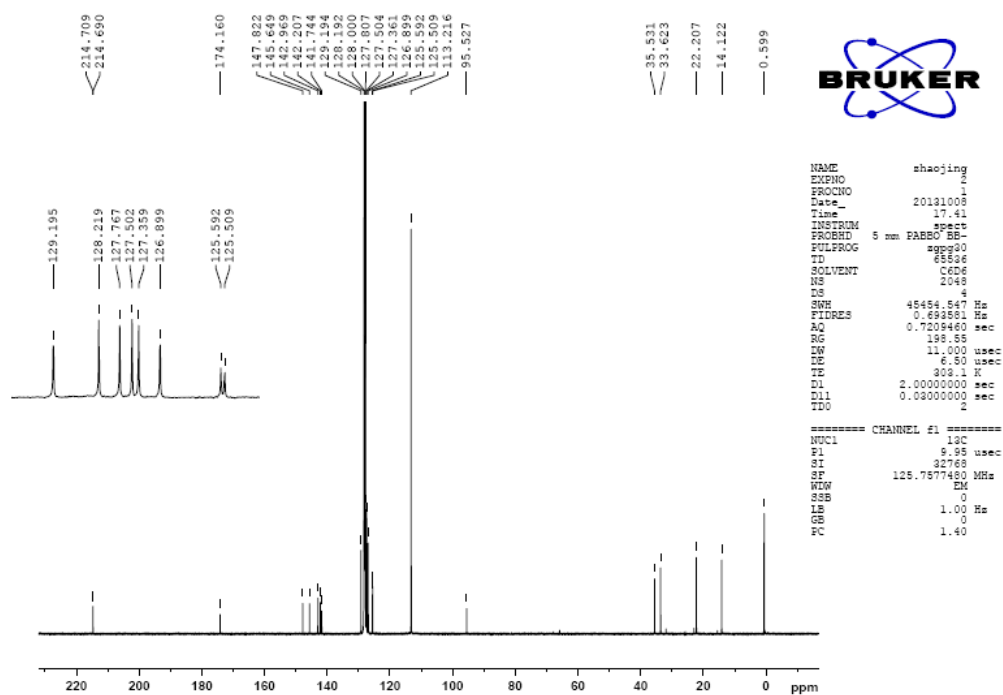



# <sup>1</sup>H NMR-6d

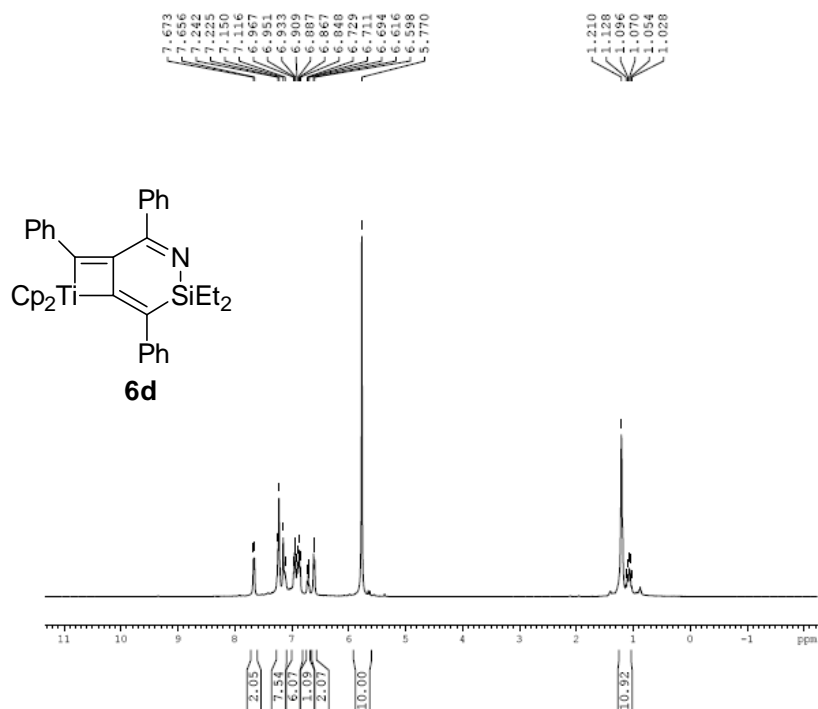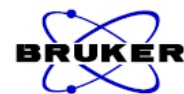

```

NAME      shaojing
EXPNO     1
PROCNO    1
Date_     20131004
Time      20.03
INSTRUM   spect
PROBHD    5 mm F4BBO BB-
PULPROG   zgpg30
TD         65536
SOLVENT   CDCl3
NS         16
DS         2
SWH        8223.688 Hz
FIDRES     0.125483 Hz
AQ         3.9846387 sec
RG          50.6
WDW         60.800 usec
DE          6.50 usec
TE         297.4 K
D1         1.00000000 sec
TD0        1

===== CHANNEL f1 =====
NUC1       1H
P1         25.00 usec
SI         65536
SF         400.1300005 MHz
WDW         EM
SSB         0
LB          0.40 Hz
GB          0
PC          1.00
  
```

# <sup>13</sup>C NMR-6d

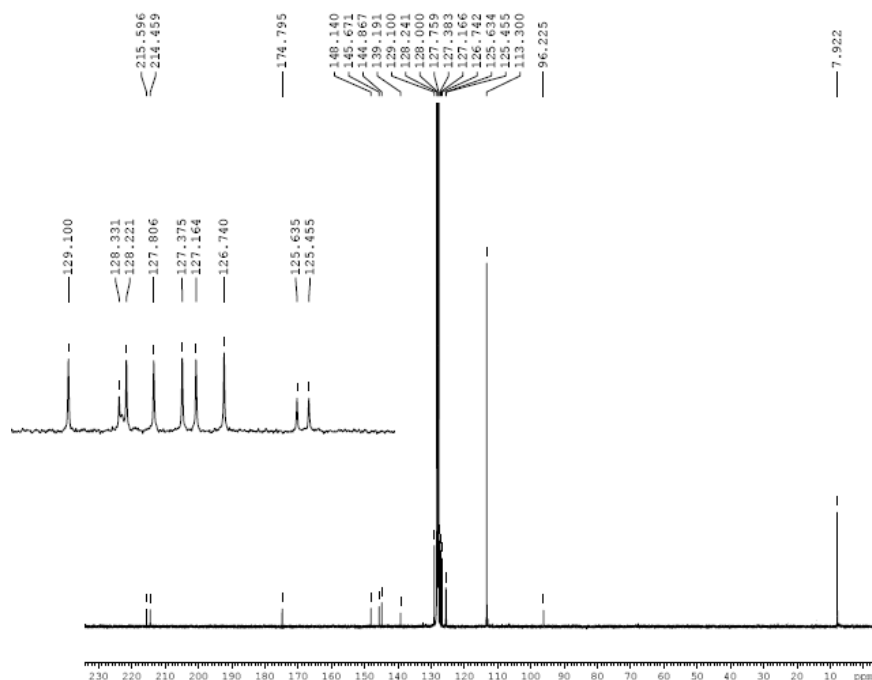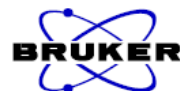

```

NAME      shaojing
EXPNO     2
PROCNO    1
Date_     20131005
Time      1.31
INSTRUM   spect
PROBHD    5 mm F4BBO BB-
PULPROG   zgpg30
TD         65536
SOLVENT   CDCl3
NS         600
DS         4
SWH        28409.092 Hz
FIDRES     0.432488 Hz
AQ         1.1534836 sec
RG          203
WDW         17.600 usec
DE          6.50 usec
TE         299.1 K
D1         2.00000000 sec
D11        0.03000000 sec
TD0        1

===== CHANNEL f1 =====
NUC1       13C
P1         12.00 usec
SI         32768
SF         100.6127865 MHz
WDW         EM
SSB         0
LB          1.00 Hz
GB          0
PC          1.40
  
```

<sup>1</sup>H NMR-6e

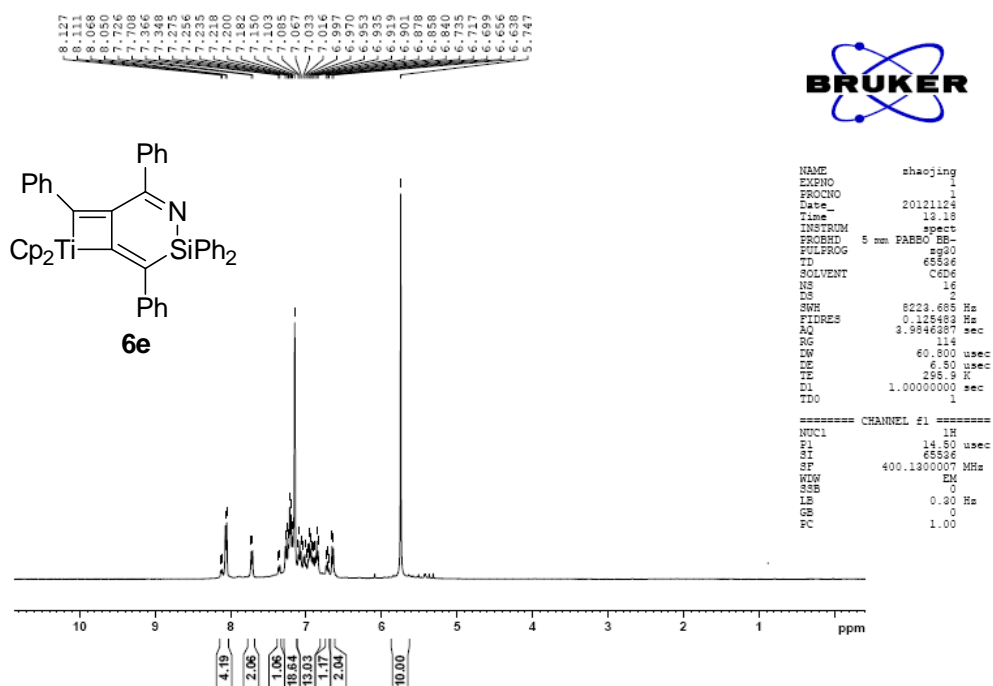

### 3) X-ray crystallographic studies

Crystals for X-ray analysis of **6a**, **6d** and **6e** were obtained as described in the preparations. Data collections for **6a**, **6d** and **6e** were performed at 100K, 180 K and 180K on a SuperNova diffractometer using graphite-monochromated Mo K $\alpha$  radiation ( $\lambda = 0.71073$  Å). Using Olex2, the structure of **6a**, **6d** and **6e** were solved with the Superflip structure solution program using Charge Flipping and refined with the XL refinement package using Least Squares minimisation. Refinement was performed on  $F^2$  anisotropically for all the non-hydrogen atoms by the full-matrix least-squares method. The hydrogen atoms were placed at the calculated positions and were included in the structure calculation without further refinement of the parameters. Crystallographic data (excluding structure factors) have been deposited with the Cambridge Crystallographic Data Centre as supplementary publication nos. CCDC-966743 (**6a**), CCDC-966742 (**6d**), and CCDC-966744 (**6e**). These data can be obtained free of charge from the Cambridge Crystallographic Data Centre via [www.ccdc.cam.ac.uk/data\\_request/cif](http://www.ccdc.cam.ac.uk/data_request/cif).

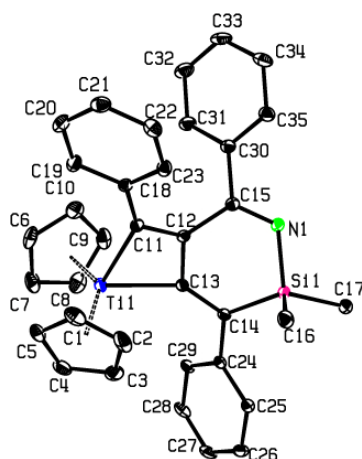

**SFigure 1.** ORTEP drawing of **6a** with 30% thermal ellipsoids. Hydrogen atoms have been omitted.

**STable 1.** Crystal data and structure refinement for **6a**.

|                             |                                                                                                                                      |
|-----------------------------|--------------------------------------------------------------------------------------------------------------------------------------|
| Identification code         | <b>6a</b>                                                                                                                            |
| Empirical formula           | C <sub>35</sub> H <sub>31</sub> NSiTi                                                                                                |
| Formula weight              | 541.60                                                                                                                               |
| Temperature                 | 99.98(11) K                                                                                                                          |
| Crystal system, space group | Monoclinic, <i>P</i> 2 <sub>1</sub> / <i>c</i>                                                                                       |
| Unit cell dimensions        | $a = 15.9762(8)$ Å $\alpha = 90.00^\circ$<br>$b = 11.2754(4)$ Å $\beta = 115.916(6)^\circ$<br>$c = 17.1936(9)$ Å $\gamma = 90^\circ$ |
| Volume                      | $2785.8(2)$ Å <sup>3</sup>                                                                                                           |
| Z, Density (calculated)     | 4, 1.291 Mg/m <sup>3</sup>                                                                                                           |

|                                                 |                                          |
|-------------------------------------------------|------------------------------------------|
| Absorption coefficient                          | 0.375 mm <sup>-1</sup>                   |
| F(000)                                          | 1136.0                                   |
| Crystal size                                    | 0.20 × 0.20 × 0.10 mm <sup>3</sup>       |
| Theta range for data collection                 | 5.82 to 52.04°                           |
| Index ranges                                    | -18 ≤ h ≤ 19, -13 ≤ k ≤ 13, -21 ≤ l ≤ 15 |
| Reflections collected / Independent reflections | 25221 / 5487[R(int) = 0.0490]            |
| Data / restraints / parameters                  | 5487/0/345                               |
| Goodness-of-fit on F <sup>2</sup>               | 1.044                                    |
| Final R indices [I>2sigma(I)]                   | R1 = 0.0389, wR2 = 0.0945                |
| R indices (all data)                            | R1 = 0.0489, wR2 = 0.1020                |
| Largest diff. peak and hole                     | 0.40/-0.41 e. Å <sup>-3</sup>            |

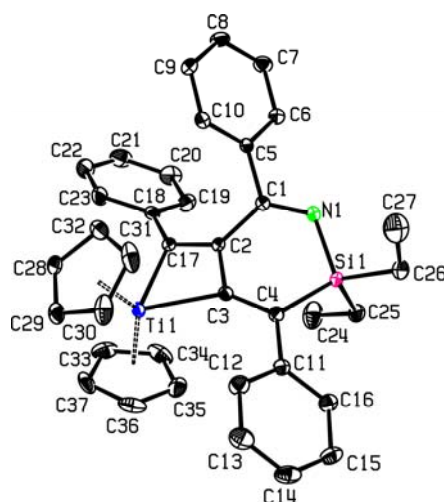

**Figure 2.** ORTEP drawing of **6d** with 30% thermal ellipsoids. Hydrogen atoms have been omitted for clarity.

**Table 2.** Crystal data and structure refinement for **6d**.

|                             |                                                |
|-----------------------------|------------------------------------------------|
| Identification code         | <b>6d</b>                                      |
| Empirical formula           | C <sub>37</sub> H <sub>35</sub> NSiTi          |
| Formula weight              | 569.65                                         |
| Temperature                 | 180.15 K                                       |
| Crystal system, space group | Monoclinic, <i>P</i> 2 <sub>1</sub> / <i>n</i> |
| Unit cell dimensions        | <i>a</i> = 10.2052(3) Å <i>α</i> = 90°         |

|                                      |                                                             |                           |
|--------------------------------------|-------------------------------------------------------------|---------------------------|
|                                      | $b = 17.3311(5) \text{ \AA}$                                | $\beta = 99.069(3)^\circ$ |
|                                      | $c = 17.0297(6) \text{ \AA}$                                | $\gamma = 90^\circ$       |
| Volume                               | $2974.35(17) \text{ \AA}^3$                                 |                           |
| Z, Calculated density                | 4, $1.272 \text{ Mg/m}^3$                                   |                           |
| Absorption coefficient               | $0.355 \text{ mm}^{-1}$                                     |                           |
| F(000)                               | 1200.0                                                      |                           |
| Crystal size                         | $0.2 \times 0.1 \times 0.1 \text{ mm}^3$                    |                           |
| Theta range for data collection      | $6.2 \text{ to } 50.054^\circ$                              |                           |
| Limiting indices                     | $-8 \leq h \leq 12, -20 \leq k \leq 17, -18 \leq l \leq 20$ |                           |
| Reflections collected / unique       | 11341 / 5222[R(int) = 0.0223]                               |                           |
| Data / restraints / parameters       | 5222/0/363                                                  |                           |
| Goodness-of-fit on $F^2$             | 1.051                                                       |                           |
| Final R indices [ $I > 2\sigma(I)$ ] | $R1 = 0.0386, wR2 = 0.0935$                                 |                           |
| R indices (all data)                 | $R1 = 0.0478, wR2 = 0.1000$                                 |                           |
| Largest diff. peak and hole          | $0.60 \text{ and } -0.39 \text{ e. \AA}^{-3}$               |                           |

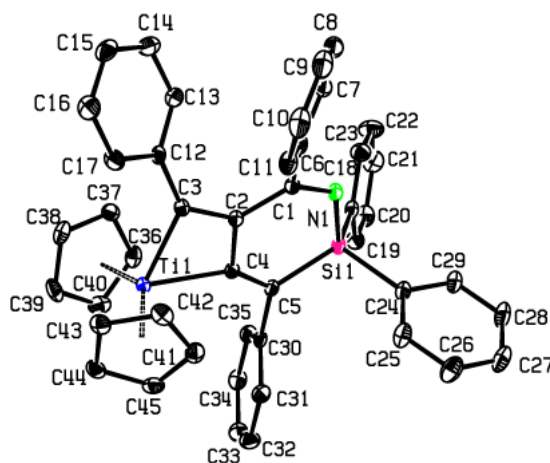

**Figure 3.** ORTEP drawing of **6e** with 30% thermal ellipsoids. Hydrogen atoms and THF have been omitted for clarity.

**Table 3.** Crystal data and structure refinement for **6e**.

|                     |                                           |
|---------------------|-------------------------------------------|
| Identification code | <b>6e</b>                                 |
| Empirical formula   | $\text{C}_{49}\text{H}_{43}\text{NSiTiO}$ |
| Formula weight      | 737.83                                    |
| Temperature         | 180.15 K                                  |

|                                      |                                                                                                                                                                 |
|--------------------------------------|-----------------------------------------------------------------------------------------------------------------------------------------------------------------|
| Crystal system, space group          | Monoclinic, <i>C2/c</i>                                                                                                                                         |
| Unit cell dimensions                 | $a = 16.2653(6) \text{ \AA}$ $\alpha = 90^\circ$<br>$b = 19.3916(6) \text{ \AA}$ $\beta = 104.915(3)^\circ$<br>$c = 24.7760(8) \text{ \AA}$ $\gamma = 90^\circ$ |
| Volume                               | $7551.3(4) \text{ \AA}^3$                                                                                                                                       |
| Z, Calculated density                | 8, $1.298 \text{ Mg/m}^3$                                                                                                                                       |
| Absorption coefficient               | $0.298 \text{ mm}^{-1}$                                                                                                                                         |
| F(000)                               | 3104.0                                                                                                                                                          |
| Crystal size                         | $0.20 \times 0.10 \times 0.10 \text{ mm}^3$                                                                                                                     |
| Theta range for data collection      | $6.55$ to $52.038^\circ$                                                                                                                                        |
| Limiting indices                     | $-20 \leq h \leq 17$ , $-19 \leq k \leq 23$ , $-30 \leq l \leq 24$                                                                                              |
| Reflections collected / unique       | 14417 / 7392 [ $R(\text{int}) = 0.0218$ ]                                                                                                                       |
| Data / restraints / parameters       | 7392/4/487                                                                                                                                                      |
| Goodness-of-fit on $F^2$             | 1.036                                                                                                                                                           |
| Final R indices [ $I > 2\sigma(I)$ ] | $R1 = 0.0469$ , $wR2 = 0.1209$                                                                                                                                  |
| R indices (all data)                 | $R1 = 0.0576$ , $wR2 = 0.1291$                                                                                                                                  |
| Largest diff. peak and hole          | $0.69$ and $-0.48 \text{ e. \AA}^{-3}$                                                                                                                          |
